# Supplementary material for: Preliminary Study of New Gallium-68 Radiolabeled Peptide Targeting NRP-1 to Detect Brain Metastases by Positron Emission Tomography
Source: MDPI journal article supplement (doi:10.3390/molecules26237273), 2021-11-30
Supplement: s1 [file s1]

## Supporting Information

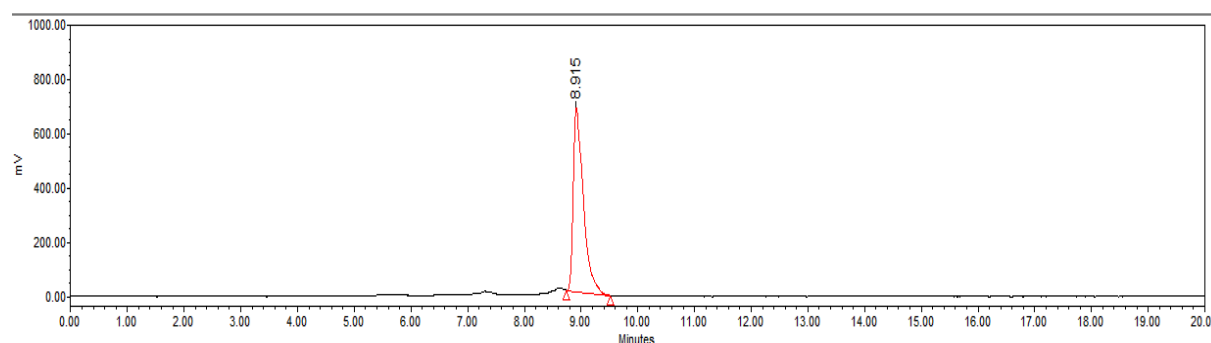

**Figure S1.** Analytical radio-HPLC profile of [ $^{68}\text{Ga}$ ]Ga-NODAGA-K(Cy5)DKPPR radiolabeling precursor. Radiochemical purity of [ $^{68}\text{Ga}$ ]Ga-NODAGA-K(Cy5)DKPPR was  $\geq 95\%$  ( $R_t = 8.9$  min (identical retention time compared to standard fig SX  $\pm 10\%$ ), Pursuit XRs 5C18,  $5\mu\text{m}$ ,  $250 \times 4.6\text{mm}$ , 10-100% ACN in gradient condition in 15 min,  $1.0\text{ mL}\cdot\text{min}^{-1}$ ).

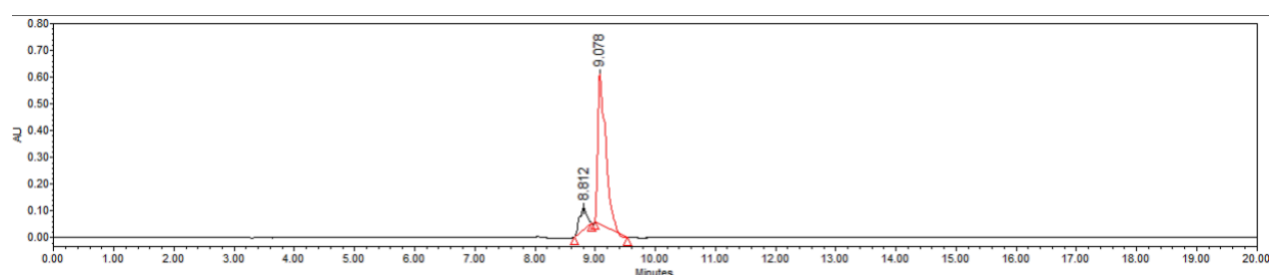

**Figure S2.** Analytical UV-HPLC profile of  $^{\text{nat}}\text{Ga}$ -NODAGA-K(Cy5)DKPPR non-radioactive reference at 640 nm ( $R_t = 9.0$  min, Pursuit XRs 5C18,  $5\mu\text{m}$ ,  $250 \times 4.6\text{mm}$ , 10-100% ACN in gradient condition in 15 min,  $1.0\text{ mL}\cdot\text{min}^{-1}$ ).

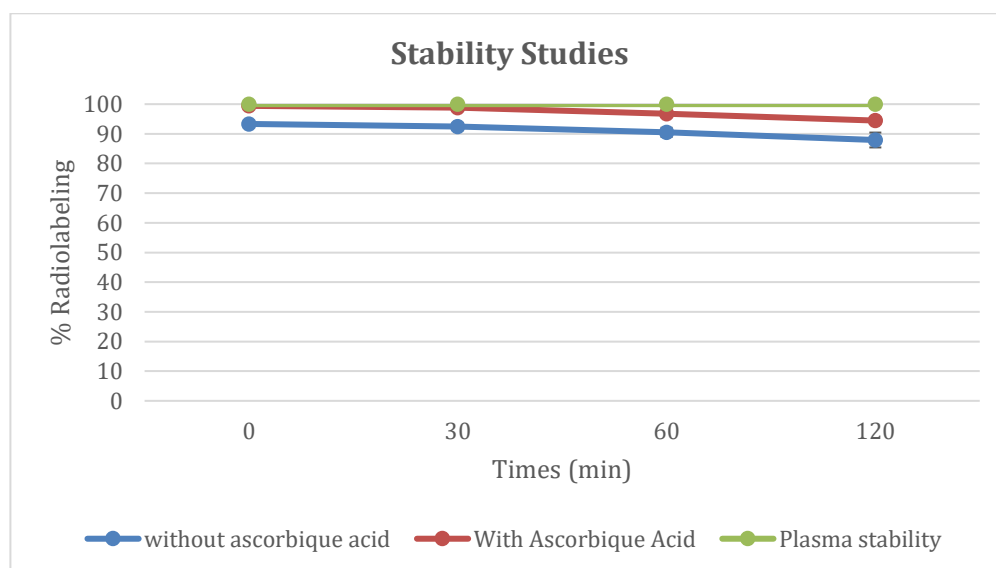

**Figure S3.** Stability studies of [ $^{68}\text{Ga}$ ]Ga-NODAGA-K(Cy5)DKPPR determined by radio-HPLC analyses.

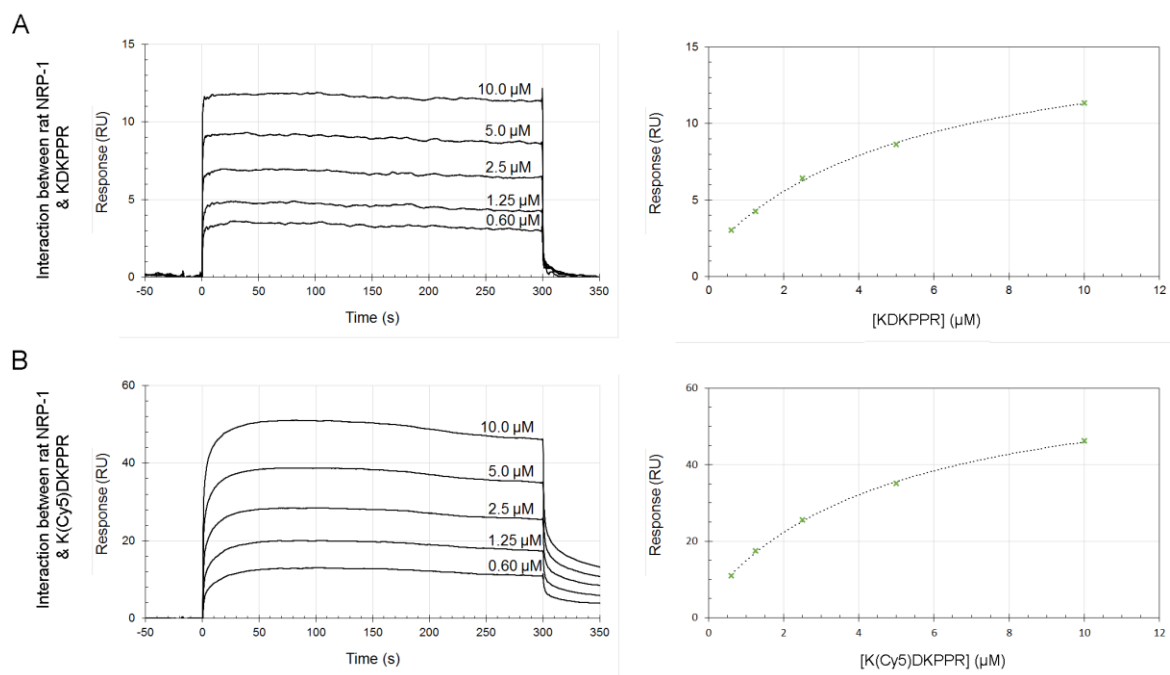

**Figure S4.** Sensorgrams (left) and titration (right) curves corresponding to the interaction between rat NRP-1 and (A) KDKPPR peptide, (B) K(Cy5)DKPPR. Briefly, IgG1 and recombinant rat NRP-1 were immobilized on two surfaces of a CM5 sensor chip. Peptides (0.60 to 10  $\mu\text{M}$ ) were injected at a flow rate of 30  $\mu\text{L}\cdot\text{min}^{-1}$  at a temperature of 25°C. Data were recorded and presented as response (RU) as a function of time (s) after double referencing: subtraction of signal obtained on the reference IgG1 surface and subtraction of buffer. These sensorgrams (left side) were used to draw titration curves (right side) by plotting responses recorded 5 s before the end of injection as a function of analyte concentrations.

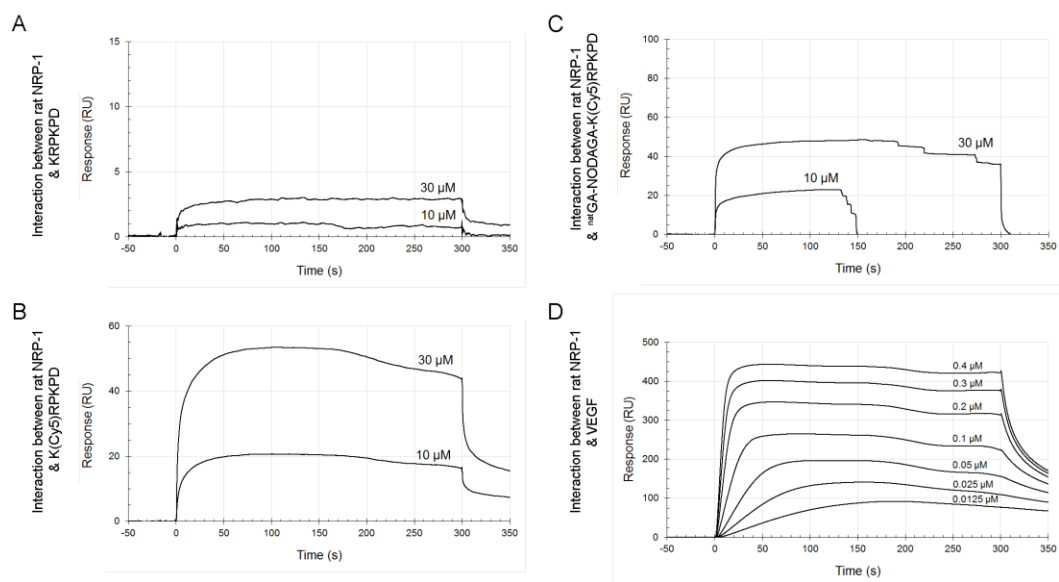

**Figure S5.** Sensorgrams showing the responses of scrambled peptides and VEGF (natural ligand) on recombinant NRP-1 protein by surface plasmon resonance (SPR). NRP-1 was immobilized on a CM5 surface. IgG1-Fc immobilized surface was used as the reference surface. Peptides were injected on the NRP1 and IgG1-Fc surfaces at 10 and 30  $\mu\text{M}$ , and VEGF was injected at concentrations ranging from 12.5 nM to 400 nM. Data were recorded and presented as response (RU) in function of time (s) after double-subtraction of signal obtained for buffer injection and on the IgG1-Fc reference surface. A, B, C and D represent the binding of KRPKPD, K(Cy5)RPKPD,  $^{\text{nat}}$ Ga-NODAGA-K(Cy5)RPKPD and VEGF respectively.

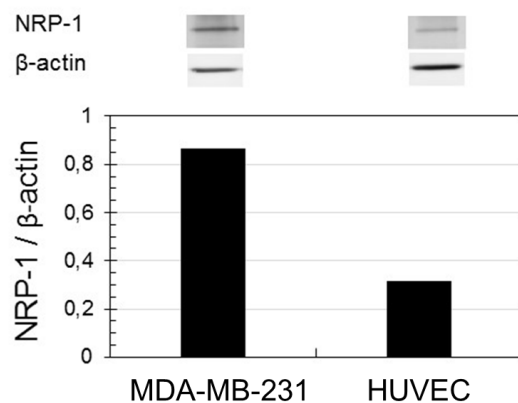

**Figure S6.** Relative expression of NRP-1 by western blotting. Upper: Protein extract were submitted to western blotting.

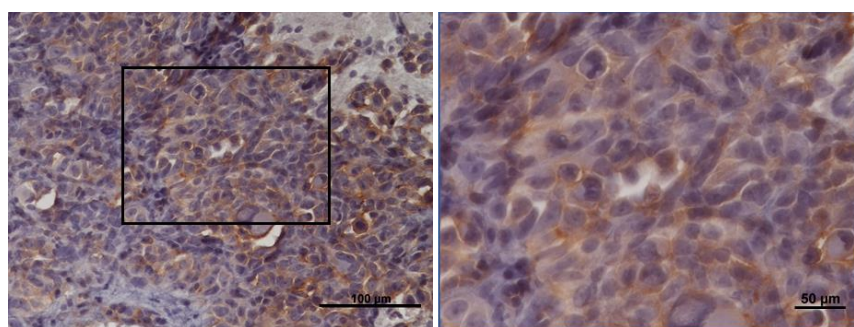

**Figure S7.** Histological brain slices made in paraffin following formalin fixation and NRP-1 marking. Scale: 100  $\mu$ m, 50  $\mu$ m. anti-NRP-1 (rabbit monoclonal, 1/800, ab81321, Abcam) staining was performed to evaluate NRP-1 tumor expression. See 4.5.4 for complete immunological protocol.

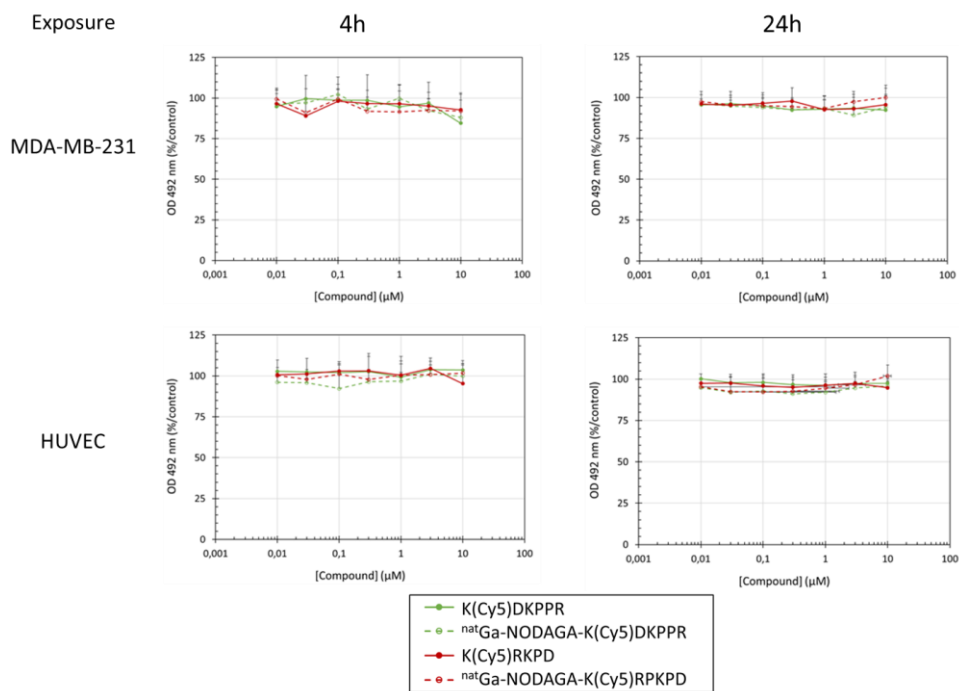

**Figure S8.** Effect of NRP-1 targeting compounds onto cellular metabolic activity. MDA-MB-231 (upper) and HUVEC (lower) were exposed to 0-10  $\mu$ M of compounds during 4 h (left) or 24 h (right). The viability of cell was assessed using MTS assay. Results were presented as mean  $\pm$  SD (n=3).

| Compounds (Name)                     | MDA MB 231                                                                          | HUVEC                                                                                |
|--------------------------------------|-------------------------------------------------------------------------------------|--------------------------------------------------------------------------------------|
| Control                              | 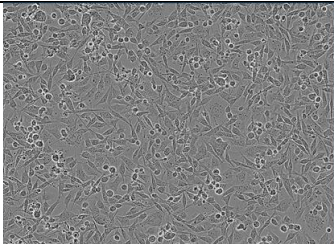   |    |
| KDKPPR                               |    |    |
| K(Cy5)DKPPR                          |   |   |
| <sup>nat</sup> Ga-NODAGA-K(Cy5)DKPPR |  |  |
| K(Cy5)RPKPD                          |  |  |
| <sup>nat</sup> Ga-NODAGA-K(Cy5)RPKPD |  |  |

**Figure S9.** Morphology of MDA MB 231 (left) and HUVEC (right) exposed to 10  $\mu$ M NRP-1 targeting or non-targeting compounds during 3 or 2 days respectively. Objective X20. Scale bar = 50  $\mu$ m.

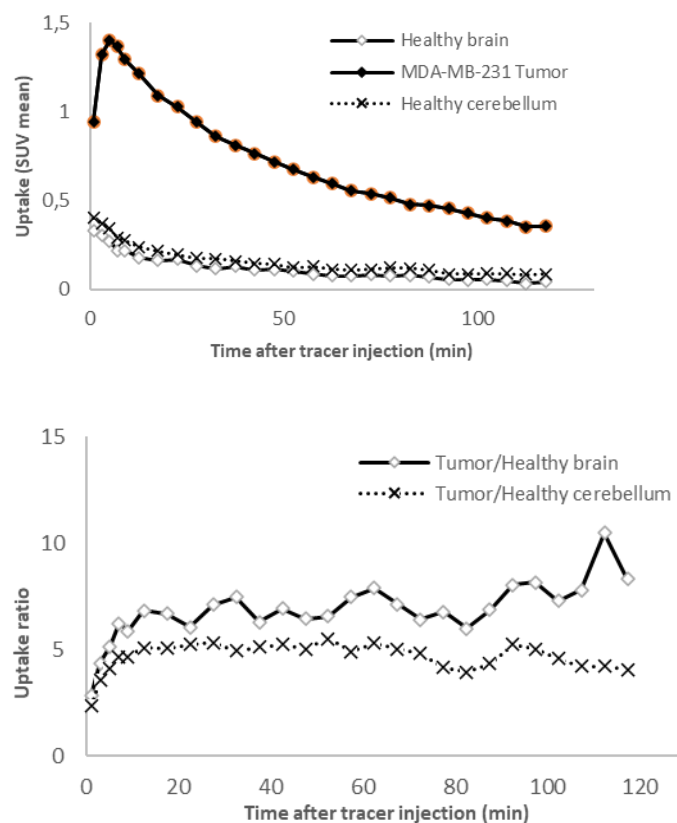

**Figure S10.** Tissue Time Activity Curves (TTAC) showing the interesting fixation profile of  $[^{68}\text{Ga}]\text{Ga-NODAGA-K(Cy5)DKPPR}$  for tumor after normalization with healthy cerebellum or healthy brain.

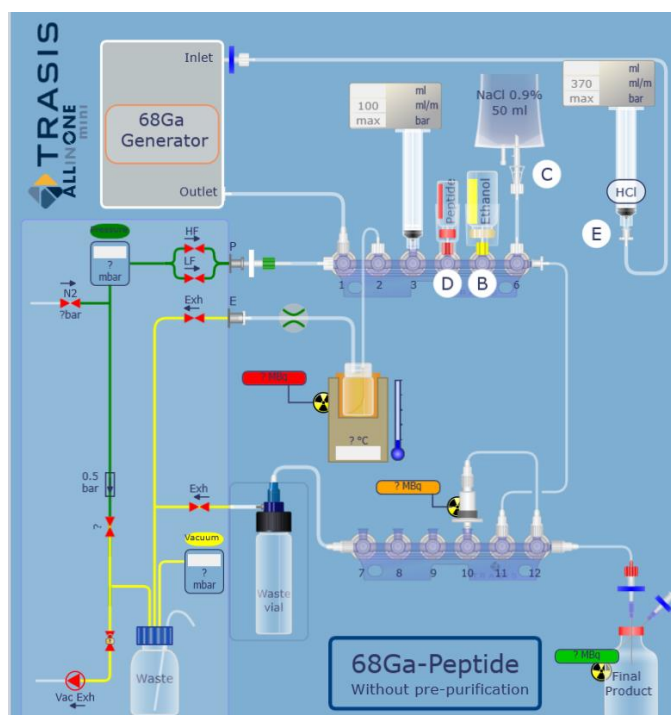

**Figure S11.** Graphical representation of single-used kit for automated radiosynthesis of  $[^{68}\text{Ga}]\text{Ga-NODAGA-K(Cy5)DKPPR}$  on mAlO (Trasis).



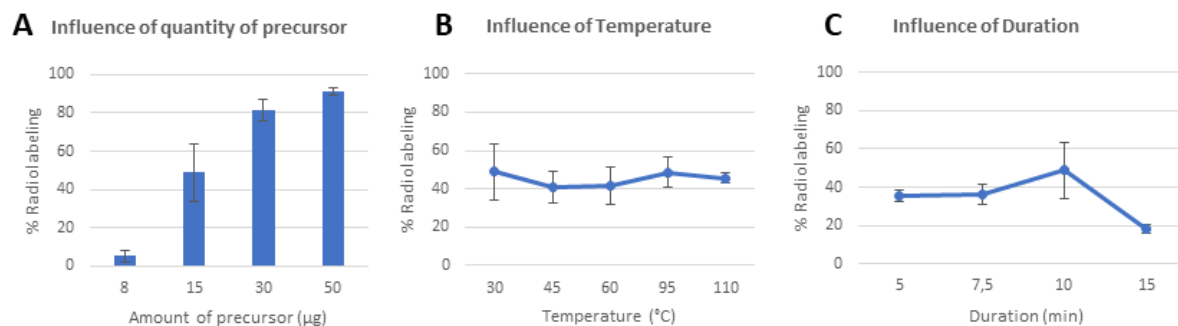

**Figure S12.** Result of radiochemical optimization for [ $^{68}\text{Ga}$ ]Ga-NODAGA-K(Cy5)DKPPR synthesis. **A:** Influence of amount of precursor was evaluated in adding various quantity of precursor NODAGA-K(Cy5)DKPPR (8,15, 30, 50  $\mu\text{L}$ ) from a stock solution of  $1 \text{ mg.mL}^{-1}$  at  $30^\circ\text{C}$  for 10 min. ( $n \geq 3$ ). **B:** Influence of temperature was evaluated with 15  $\mu\text{g}$  of precursor NODAGA-K(Cy5)DKPPR diluted in 0.8 M AcONa 1 mL for 10 min ( $n \geq 3$ ). **C:** Influence of reaction time was evaluated with 15  $\mu\text{g}$  of precursor NODAGA-K(Cy5)DKPPR diluted in 0.8 M AcONa 1 mL at  $30^\circ\text{C}$  ( $n \geq 3$ ).
